# Supplementary material for: Genetic dissection of assortative mating behavior
Source: PLOS journal article supplement (doi:10.1371/journal.pbio.2005902), 2019-02-07

# Genetic dissection of assortative mating behavior

**Richard M. Merrill**<sup>1,2,3,\*</sup>, **Pasi Rastas**<sup>2</sup>, **Simon H. Martin**<sup>2</sup>, **Maria C. Melo**<sup>3,4</sup>, **Sarah Barker**<sup>2</sup>, **John Davey**<sup>2,5</sup>, **W. Owen McMillan**<sup>3</sup> & **Chris D. Jiggins**<sup>2</sup>

**1** Division of Evolutionary Biology, Ludwig-Maximilians-Universität, München, Germany **2** Department of Zoology, University of Cambridge, Cambridge, UK **3** Smithsonian Tropical Research Institute, Panama City, Panama **4** IST Austria, Klosterburg, Austria **5** Department of Biology, University of York, York, UK

\*merrill@bio.lmu.de

## Supporting Information: Figures S4

**Figure S4. Proportion of trial time in which backcross to *cydno* males courted females of either type.**

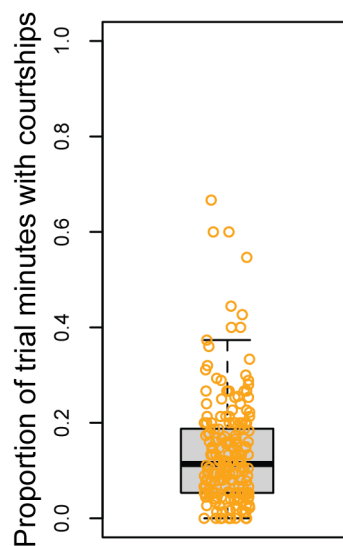

Supplement: S4 (10.1371/journal.pbio.2005902.s004) [file journal.pbio.2005902.s004]
